# Supplementary material
Source: Springer Nature journal article supplement (https://www.springermedizin.de/resource/supplementary/12888_2014_1654_MOESM8_ESM.pdf/9481114)

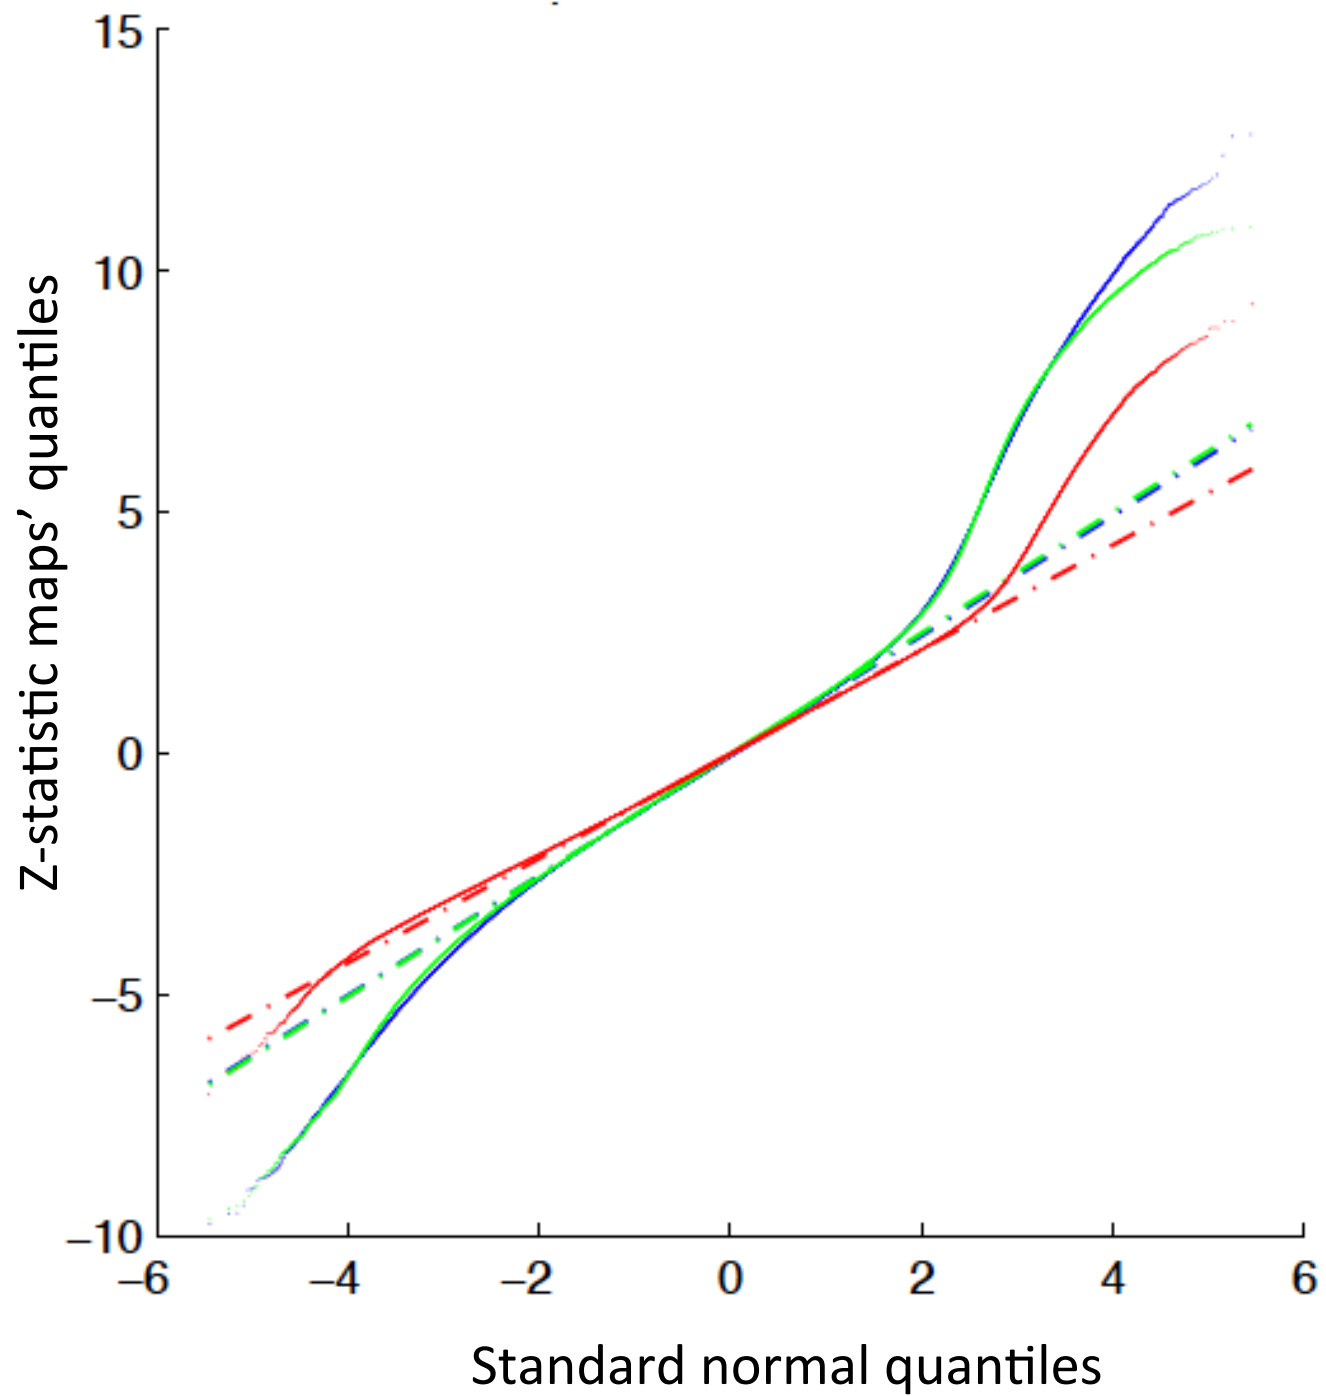

Supplement: MOESM8 [file 9481114]
